# Supplementary material
Source: HighWire-hosted journal article supplement (https://jnm.snmjournals.org/highwire/filestream/95060/field_highwire_adjunct_files/0/177048_Supplemental_Data.pdf)
Supplement: 177048_Supplemental_Data.pdf [file 177048_Supplemental_Data.pdf]

**SUPPLEMENTAL TABLE 1.** Biodistribution of  $^{68}\text{Ga}$ -BBN-RGD in healthy volunteers (SUV, mean  $\pm$  standard deviation, n = 5)

| Organs                 | Time (min)      |                 |                  |                  |                  |                  |                 |
|------------------------|-----------------|-----------------|------------------|------------------|------------------|------------------|-----------------|
|                        | 1               | 5               | 10               | 15               | 30               | 45               | 60              |
| <b>brain</b>           | 0.26 $\pm$ 0.13 | 0.20 $\pm$ 0.10 | 0.20 $\pm$ 0.12  | 0.18 $\pm$ 0.08  | 0.16 $\pm$ 0.05  | 0.16 $\pm$ 0.09  | 0.18 $\pm$ 0.08 |
| <b>heart</b>           | 3.94 $\pm$ 1.25 | 2.52 $\pm$ 0.60 | 1.90 $\pm$ 0.50  | 1.36 $\pm$ 0.32  | 1.20 $\pm$ 0.29  | 1.06 $\pm$ 0.27  | 0.90 $\pm$ 0.23 |
| <b>lung</b>            | 1.52 $\pm$ 0.66 | 0.90 $\pm$ 0.35 | 0.74 $\pm$ 0.15  | 0.56 $\pm$ 0.09  | 0.44 $\pm$ 0.11  | 0.42 $\pm$ 0.08  | 0.36 $\pm$ 0.09 |
| <b>liver</b>           | 3.84 $\pm$ 0.96 | 2.68 $\pm$ 0.16 | 1.94 $\pm$ 0.26  | 1.84 $\pm$ 0.30  | 1.54 $\pm$ 0.24  | 1.54 $\pm$ 0.23  | 1.54 $\pm$ 0.23 |
| <b>spleen</b>          | 3.56 $\pm$ 0.62 | 2.60 $\pm$ 0.31 | 2.06 $\pm$ 0.60  | 2.22 $\pm$ 0.71  | 1.80 $\pm$ 0.46  | 1.84 $\pm$ 0.35  | 1.64 $\pm$ 0.49 |
| <b>pancreas</b>        | 11.3 $\pm$ 1.05 | 14.3 $\pm$ 2.38 | 14.60 $\pm$ 1.70 | 12.8 $\pm$ 1.20  | 10.96 $\pm$ 1.10 | 10.48 $\pm$ 1.10 | 9.72 $\pm$ 0.80 |
| <b>kidneys</b>         | 8.68 $\pm$ 2.18 | 6.84 $\pm$ 0.26 | 6.78 $\pm$ 1.19  | 5.38 $\pm$ 0.68  | 3.62 $\pm$ 0.69  | 3.16 $\pm$ 0.66  | 2.9 $\pm$ 0.70  |
| <b>stomach wall</b>    | 1.78 $\pm$ 1.04 | 1.62 $\pm$ 0.36 | 1.06 $\pm$ 0.27  | 0.96 $\pm$ 0.25  | 0.90 $\pm$ 0.22  | 0.96 $\pm$ 0.33  | 0.80 $\pm$ 0.24 |
| <b>small intestine</b> | 1.60 $\pm$ 0.75 | 1.70 $\pm$ 0.56 | 1.34 $\pm$ 0.26  | 1.12 $\pm$ 0.41  | 1.14 $\pm$ 0.24  | 1.02 $\pm$ 0.38  | 0.92 $\pm$ 0.28 |
| <b>bladder</b>         | 0.46 $\pm$ 0.64 | 17.5 $\pm$ 7.82 | 44.82 $\pm$ 12.4 | 66.94 $\pm$ 16.0 | 74.56 $\pm$ 17.7 | 69.2 $\pm$ 13.7  | 65.0 $\pm$ 17.8 |
| <b>red marrow</b>      | 0.62 $\pm$ 0.67 | 0.90 $\pm$ 0.19 | 0.66 $\pm$ 0.24  | 0.74 $\pm$ 0.19  | 0.72 $\pm$ 0.45  | 0.84 $\pm$ 0.40  | 0.84 $\pm$ 0.44 |
| <b>muscle</b>          | 0.16 $\pm$ 0.09 | 0.66 $\pm$ 0.18 | 0.54 $\pm$ 0.15  | 0.46 $\pm$ 0.09  | 0.4 $\pm$ 0.16   | 0.46 $\pm$ 0.15  | 0.54 $\pm$ 0.21 |
